## CORRESPONDENCE

Anesthesiology  
2000; 92:1200  
© 2000 American Society of Anesthesiologists, Inc.  
Lippincott Williams & Wilkins, Inc.

*In Reply:*—The publication of several letters to the editor concerning management of the bearded airway occurred concurrent to the formulation of our correspondence<sup>1</sup> and were regretfully excluded from the discussion and references. This flurry of furry correspondence in the journal *Anaesthesia* highlights the ubiquity of the problem, and also the range of solutions, depending on the resources that are available.<sup>2-7</sup>

**Joel O. Johnson, M.D., Ph.D.**  
Associate Professor  
Department of Anesthesiology and  
Perioperative Medicine  
The University of Missouri  
Columbia, Missouri  
johnsonjo@missouri.edu

Anesthesiology  
2000; 92:1200  
© 2000 American Society of Anesthesiologists, Inc.  
Lippincott Williams & Wilkins, Inc.

## Aseptic Meningitis after Spinal Anesthesia in an Infant

*To the Editor:*—We read with interest the report by Easley *et al.*<sup>1</sup> of aseptic meningitis after spinal anesthesia in an infant. Although the report is a poignant reminder that this complication is a risk when performing spinal anesthesia in any patient, adult or neonate, we have several concerns. First, the differential diagnosis between viral meningitis and aseptic meningitis is, at best, difficult to make. Based on the authors description of the cerebrospinal fluid findings, diagnosis does not rule out viral meningitis.<sup>2</sup> Second, in the concluding paragraph, the authors state that they suspected aseptic meningitis, but could not prove a causal relation.<sup>1</sup> As illustrated in a recent report of two infants who were diagnosed with meningitis—one after and one immediately before placement of a spinal anesthetic—the onset of meningitis may be coincidentally timed with the induction of the spinal anesthetic.<sup>3</sup> In such cases, the causal relation between aseptic meningitis and the spinal anesthetic should be a diagnosis of exclusion. We believe that viral meningitis was not ruled out in the report by Easley *et al.*<sup>1</sup>

**Amr Abouleish, M.D., M.B.A.**  
Associate Professor  
**N. Chai Nguyen, M.D.**  
Assistant Professor

## References

1. Johnson JO, Bradway JA, Blood T: A hairy situation (letter). *ANESTHESIOLOGY* 1999; 91:595
2. Alexander R, Thomas DI: Overcoming the beard (letter). *Anaesthesia* 1999; 54:100
3. Crooke J: The bearded airway (letter). *Anaesthesia* 1999; 54:500
4. Hancock AC: The bearded airway (letter). *Anaesthesia* 1999; 54:408
5. Moore EW, Cowan CM: A close shave (letter). *Anaesthesia* 1999; 54:305
6. Vincent C, Ames WA: The bearded airway (letter). *Anaesthesia* 1998; 53:1034-5
7. Thomas DI: Overcoming the beard (letter). *Anesthesia* 1999; 54:100

(Accepted for publication July 8, 1999.)

**James F. Mayhew, M.D.**  
Professor  
Division of Pediatric Anesthesiology  
University of Texas Medical Branch  
Galveston, Texas  
jfmayhew@utmb.edu

## References

1. Easley RB, George R, Connors D, Tobias JD: Aseptic meningitis after spinal anesthesia in an infant. *ANESTHESIOLOGY* 1999; 91:305-7
2. Prober CG: Infections of the central nervous system, viral meningoencephalitis, Nelson Textbook of Pediatrics, 15th edition. Edited by Behrman RE, Kliegman RM, Arvin AM. Philadelphia, WB Saunders, 1996, pp 713-6
3. Luz G, Buchele H, Innerhofer P, Maurer H: Spinal anaesthesia and meningitis in former preterm infants: Cause-effect? *Paediatr Anaesth* 1999; 9:262-4

(Accepted for publication November 4, 1999.)
